# Supplementary material for: The Effects of Non-Fiber Carbohydrate Content and Forage Type on Rumen Microbiome of Dairy Cows
Source: MDPI journal article supplement (doi:10.3390/ani11123519), 2021-12-10
Supplement: s1 [file s1]

## Supplementary Tables

Supplementary Table S1. Ingredients and chemical composition of the 3 experimental diets

| Items                                       | Treatment <sup>a</sup> |       |       |
|---------------------------------------------|------------------------|-------|-------|
|                                             | AH                     | L-NFC | H-NFC |
| Dietary ingredient, g/kg of DM              |                        |       |       |
| Alfalfa hay                                 | 149.0                  | 0.0   | 0.0   |
| Oat hay                                     | 49.5                   | 44.1  | 46.8  |
| Corn stover                                 | 0.0                    | 147.0 | 148.0 |
| Corn silage                                 | 267.0                  | 257.0 | 266.0 |
| Ground corn grain                           | 297.0                  | 229.0 | 299.0 |
| Wheat bran                                  | 49.5                   | 103.0 | 5.4   |
| Soybean meal                                | 99.0                   | 177.0 | 175.0 |
| Cottonseed meal                             | 49.5                   | 4.9   | 21.2  |
| Premix <sup>b</sup>                         | 39.6                   | 38.2  | 39.4  |
| Chemical composition <sup>c</sup> , % of DM |                        |       |       |
| Dry matter                                  | 46.2                   | 46.4  | 45.5  |
| Crude protein                               | 15.0                   | 14.9  | 14.5  |
| RDP, % of Crude protein                     | 64.2                   | 63.3  | 62.1  |
| RUP, % of Crude protein                     | 35.8                   | 36.7  | 37.9  |
| Ether extracts                              | 3.8                    | 3.6   | 3.6   |
| Crude ash                                   | 7.7                    | 8.3   | 7.5   |
| Neutral detergent fiber                     | 34.6                   | 37.5  | 34.3  |
| Acid detergent fiber                        | 19.5                   | 19.9  | 19.0  |
| Non-fiber carbohydrate <sup>c</sup>         | 38.9                   | 35.6  | 40.1  |
| NE <sub>L</sub> , MJ/kg                     | 6.73                   | 6.57  | 6.69  |
| Diet price <sup>d</sup> , \$/kg DM          | 0.388                  | 0.353 | 0.360 |

This table is cited from Wei et al. (2018)

<sup>a</sup>AH = Total mixed rations containing alfalfa hay; L-NFC = Total mixed rations containing corn stover with low content of non-fiber carbohydrates; H-NFC = Total mixed rations containing corn stover with high content of non-fiber carbohydrates similar to AH.

<sup>b</sup>Contained (per kilogram of DM): 250,000 IU of vitamin A, 50,000 IU of vitamin D, 1,100 IU of vitamin E, 600 mg of Fe, 650 mg of Cu, 3,000 mg of Zn, 630 mg of Mn, 17 mg of Se, 36 mg of I, 8 mg of Co, 150-180 g of salt, water  $\leq$ 100 g

<sup>c</sup>Non-fiber carbohydrate = 100 – % neutral detergent fiber – % crude protein – % ether extract – % ash; RDP (rumen-degradable protein), RUP (rumen-undegradable protein ) and NEL were estimated according to CPM dairy 3.0

<sup>d</sup>Diet price was calculated based on the ingredient purchase prices by the farm

Supplementary Table S2. Statistical result by fitting the environmental vectors onto microbiota ordination

| Constrains                   | R2    | P value <sup>1</sup> |
|------------------------------|-------|----------------------|
| <b>Diet composition</b>      |       |                      |
| Dry matter                   | 0.004 | 0.929                |
| Crude protein                | 0.124 | 0.134                |
| RDP                          | 0.068 | 0.343                |
| RUP                          | 0.068 | 0.342                |
| Ether extracts               | 0.000 | 0.997                |
| Crude ash                    | 0.206 | 0.027*               |
| Acidic detergent fiber       | 0.223 | 0.022*               |
| Neutral detergent fiber      | 0.182 | 0.045*               |
| Non-fiber carbohydrate       | 0.208 | 0.028*               |
| Starch                       | 0.154 | 0.073                |
| Sugar                        | 0.056 | 0.411                |
| <b>Physiological indexes</b> |       |                      |
| Dry matter intake            | 0.276 | 0.007**              |
| Milk yield                   | 0.073 | 0.274                |

|                                      |       |         |
|--------------------------------------|-------|---------|
| Feed efficiency                      | 0.114 | 0.157   |
| Milk fat                             | 0.096 | 0.199   |
| Total solid                          | 0.139 | 0.086   |
| Milk urine nitrogen                  | 0.130 | 0.115   |
| Blood urine nitrogen                 | 0.071 | 0.321   |
| Urine nitrogen                       | 0.268 | 0.006** |
| Urine volume                         | 0.063 | 0.355   |
| <b>Rumen fermentation parameters</b> |       |         |
| pH                                   | 0.016 | 0.792   |
| Ammonia nitrogen                     | 0.120 | 0.121   |
| Acetate                              | 0.069 | 0.312   |
| Propionate                           | 0.326 | 0.006** |
| Butyrate                             | 0.185 | 0.036*  |
| Isobutyrate                          | 0.607 | 0.001** |
| Valerate                             | 0.307 | 0.002** |
| Isovalerate                          | 0.235 | 0.023*  |
| Total VFA                            | 0.056 | 0.412   |
| Acetate/Propionate ratio             | 0.243 | 0.012*  |

---

<sup>1</sup>  $P \leq 0.01$  were marked with \*\*, and  $0.01 < P \leq 0.05$  were marked with \*
